# Supplementary material for: Analysis of Chemical Composition and In Vitro and In Vivo Antifungal Activity of Raphanus raphanistrum Extracts against Fusarium and Pythiaceae, Affecting Apple and Peach Seedlings
Source: MDPI journal article supplement (doi:10.3390/molecules26092479), 2021-04-23
Supplement: s1 [file s1]

**Table S1.** Constituents of the fraction F7–8 identified by Gas Chromatography Analysis (CPG).

| Noun                                           | Retention Time | percentage | structure                                                                            |
|------------------------------------------------|----------------|------------|--------------------------------------------------------------------------------------|
| Alcohols                                       |                |            |                                                                                      |
| Hexadecanol                                    | 21,58          | 1,54       |    |
| 4-Hydroxy-3-(4-methylphenylthio) butanenitrile | 33,22          | 0,82       |    |
| Pentadecanol                                   | 15,09          | 0,68       |    |
| 2,5-Di-tert-butylhydroxybenzene                | 16,27          | 2,69       |    |
| Aldehydes                                      |                |            |                                                                                      |
| Citronellyl formate                            | 14,07          | 0,63       |   |
| Cetones                                        |                |            |                                                                                      |
| 4-Hydroxy-2-methylacetophenone                 | 14,52          | 2,34       |  |
| 6,10-Dimethylundecan-2-one                     | 18,72          | 3,52       |  |
| Ester                                          |                |            |                                                                                      |
| Methyl oleate                                  | 20,79          | 2,05       |  |
| Methyl 9-oxononanoate                          | 19,27          | 2,27       |  |
| Ethers                                         |                |            |                                                                                      |

|                          |       |       |                                                                                     |
|--------------------------|-------|-------|-------------------------------------------------------------------------------------|
| Hexadecene epoxide       | 18,86 | 1,58  | 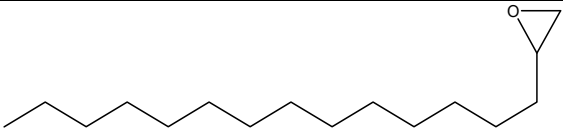  |
| 2-Isobutyl-3-methylfuran | 17,60 | 1,18  |  |
| Unsaturated hydrocarbons |       |       |                                                                                     |
| 4-Methyl-1,4-heptadiene  | 13,69 | 1,82  |   |
| 1-Octadecene             | 18,28 | 23,64 |   |
| 1-Hexadecene             | 16,74 | 17,71 |   |
| Saturated hydrocarbons   |       |       |                                                                                     |
| Methylcyclooctane        | 16,99 | 1,15  |  |

**Table S2.** Constituents of the fraction F9 identified by Gas Chromatography Analysis (CPG) .

| Noun                            | Retention Time | Percentage | Structure |
|---------------------------------|----------------|------------|-----------|
| Carboxylic Acids                |                |            |           |
| Acide -2-méthylundec-10-énoïque | 15,59          | 0,69       |           |
| Alcohol                         |                |            |           |
| Hexahydrofarnesol               | 17,80          | 1,77       |           |
| 1-Octanol, 2-butyl              | 15,70          | 0,87       |           |
| 2,4-Di-tert-butylphenol         | 16,29          | 2,98       |           |
| 1-Octadecanol                   | 13,25          | 0,76       |           |
| 7-HYDROXYDISPIRO(2.2)OCTANE     | 13,45          | 0,74       |           |
| 2-Hexyn-1-ol                    | 12,00          | 0,51       |           |
| Aldehydes                       |                |            |           |
| 2-PENTYNAL                      | 17,24          | 1,2        |           |
| beta.-Methylcrotonaldehyde      | 13,37          | 0,53       |           |
| 2-Decenal, (E)                  | 14,06          | 4,59       |           |
| Amine                           |                |            |           |

|                                |       |       |                                                                                      |
|--------------------------------|-------|-------|--------------------------------------------------------------------------------------|
| Azetidine, 1,2-dimethyl        | 9,19  | 1,73  | 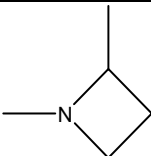   |
| 1H-Indole                      | 14,71 | 11,55 |    |
| Cetones                        |       |       |                                                                                      |
| 3-ETHYLCYCLOPENT-2-EN-1-ONE    | 14,36 | 0,80  |    |
| Hexahydrofarnesyl acetone      |       |       |    |
| Ester                          |       |       |                                                                                      |
| Hexadecanoate de méthyle       | 19,29 | 3,97  |   |
| Ether                          |       |       |                                                                                      |
| Furan, 2-pentyl                | 11,23 | 1,57  |  |
| Unsaturated hydrocarbons       |       |       |                                                                                      |
| 4,4-Dimethyl-cis-2-pentene     | 15,88 | 1,88  |  |
| 1-Hexadecene                   | 16,76 | 8,61  |  |
| Ethylbutyl acetylene           | 16,98 | 2,59  |  |
| 1,5-Heptadiene, 2-methyl-, (Z) | 18,06 | 1,31  |  |
| 1-Octadecene                   | 18,27 | 5,30  |  |
| 1-Tetradecene                  | 15,10 | 3,59  |  |

|                                              |       |      |                                                                                     |
|----------------------------------------------|-------|------|-------------------------------------------------------------------------------------|
| (4R,5S)-4-(1-propyn-1-yl)-5-vinylcyclohexene | 15,34 | 2,39 | 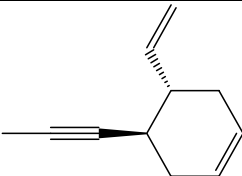  |
| 1,2-Pentadiene, 4,4-dimethyl                 | 12,44 | 0,77 |   |
| Saturated hydrocarbons                       |       |      |                                                                                     |
| Isobutylene dichloride                       | 14,98 | 1,60 |   |
| Others                                       |       |      |                                                                                     |
| Methane, sulfinylbis                         | 9,81  | 5,68 |   |
| Thiocyanic acid, ethyle                      | 13,76 | 3,93 |   |
| DIMETHYLPHOSPHINIC ACID                      | 10,63 | 0,65 |  |

**Table S3.** Constituents of the fraction F10 identified by Gas Chromatography Analysis (CPG).

| Noun                                | Retention Time | Percentage | Structure |
|-------------------------------------|----------------|------------|-----------|
| Alcohols                            |                |            |           |
| 1,3-Benzenediol, 3-methyl           | 18,72          | 16,70      |           |
| 1,12-Dodecanediol                   | 20,77          | 0,77       |           |
| Phenol, 2,4-bis(1,1-dimethylethyl)  | 16,26          | 3,82       |           |
| beta.-Citronellol                   | 16,55          | 0,50       |           |
| Aldehyde                            |                |            |           |
| 3-(1-Nitro-2-oxocyclohexyl)propanal | 13,71          | 1,12       |           |
| Amine                               |                |            |           |
| Benzenamine, 2-methyl               | 17,70          | 3,20       |           |
| Cetone                              |                |            |           |
| 1-Propanone, 2-methyl-1-pyrazinyl   | 17,22          | 1,08       |           |
| Ester                               |                |            |           |
| 8-oxooctanoate de méthyle           | 19,27          | 0,88       |           |
| Ethers                              |                |            |           |

|                                       |                   |       |                                                                                      |
|---------------------------------------|-------------------|-------|--------------------------------------------------------------------------------------|
| Furan, 2-(methoxymethyl)              | 11,18             | 2,12  | 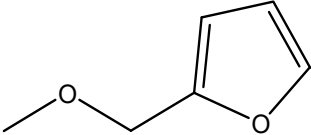   |
| Tetrahydro-2-methyl-3-methylene-furan | 14,02             | 1,81  |    |
| Unsaturated hydrocarbons              |                   |       |                                                                                      |
| 1-Hexadecene                          | 16,74             | 13,61 |    |
| 7-chloro Hept-3-yne                   | 13,86             | 0,73  |    |
| Pentatriacont-17-ene                  | 21,57             | 0,81  |    |
| Octadecene                            | 18,25             | 10,22 |    |
| Saturated hydrocarbons                |                   |       |                                                                                      |
| Decane, 2-methyl                      | 15,67             | 0,81  |    |
| Hexadecane, 1-chloro                  | 16,98             | 0,81  |   |
| Nitrile                               |                   |       |                                                                                      |
| Benzeneacetonitrile, 4-fluoro         | 1<br>4,<br>5<br>3 | 2,70  |  |

**Table S4.** Constituents of the fraction F11 identified by Gas Chromatography Analysis (CPG) .

| Noun                                                                                         | Retention Time | Percentage | Structure |
|----------------------------------------------------------------------------------------------|----------------|------------|-----------|
| Alcohols                                                                                     |                |            |           |
| 6-Methyl-1-heptanol                                                                          | 15,10          | 1,34       |           |
| Phenol, 3,5-bis(1,1-dimethylethyl)                                                           | 16,27          | 4,09       |           |
| 2-Heptyn-1-ol                                                                                | 17,26          | 0,82       |           |
| 1,5-Pentanediol, 3-methyl                                                                    | 18,86          | 1,10       |           |
| trans -2-Hepten-1-ol                                                                         | 20,78          | 0,99       |           |
| Hexacosylalcohol                                                                             | 21,57          | 1,44       |           |
| 1-Hexadecanol                                                                                | 27,84          | 0,51       |           |
| 4-Nitro-2,6-dichlorophenol                                                                   | 32,75          | 0,69       |           |
| Aldehyde                                                                                     |                |            |           |
| 2-trans-Hexenal                                                                              | 17,02          | 1,65       |           |
| Amides                                                                                       |                |            |           |
| 4-Aminobutyric acid lactam                                                                   | 10,24          | 0,94       |           |
| (1RS,2RS,3RS,7RS)-1,2,6,6-tetramethyl-10-oxatricyclo[5.2.1.0(2,7)]dec-3-yl N-phenylcarbamate | 26,82          | 1,25       |           |
| Amines                                                                                       |                |            |           |



|                                                                  |       |       |                                                                                      |
|------------------------------------------------------------------|-------|-------|--------------------------------------------------------------------------------------|
| Azetidine, 1-bromo-amine                                         | 32,23 | 0,75  | 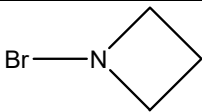   |
| Isoxazolidine, 4-(fluoromethylene)-2-methyl-3-phenyl-, (Z)-amine | 33,38 | 0,48  |    |
| Esters                                                           |       |       |                                                                                      |
| methyl 2-bromo-2-butenolate                                      | 19,61 | 1,30  |    |
| ETHYL 2-METHYL-3-OXOHEXANOATE                                    | 10,50 | 2,66  |    |
| Unsaturated hydrocarbons                                         |       |       |                                                                                      |
| 1,cis-3-Pentadiene                                               | 16,54 | 0,66  |   |
| 1-Hexadecene                                                     | 16,74 | 29,13 |  |
| 9-Octadecene, (E)                                                | 18,25 | 26,26 |  |
| 17-Pentatriacontene                                              | 19,79 | 7,37  |  |
| Saturated hydrocarbons                                           |       |       |                                                                                      |
| Silane, trichloroeicosyl                                         | 17,40 | 0,55  |  |
| Decyl fluoride                                                   | 19,34 | 1,37  |  |
| Nitrile                                                          |       |       |                                                                                      |
| Butanenitrile, 4-hydroxy-3-[(4-methylphenyl)thio] nitrile        | 23,87 | 0,52  |  |

**Table S5.** Constituents of the fraction F12 identified by Gas Chromatography Analysis (CPG).

| Noun                                                                                                                           | Retention Time | Percentage | Structure |
|--------------------------------------------------------------------------------------------------------------------------------|----------------|------------|-----------|
| Alcohols                                                                                                                       |                |            |           |
| 3-methoxyphenol                                                                                                                | 18.79          | 2.01       |           |
| 2,5-Di-tert-butylhydroxybenzene<br>Phenol, 2,4-bis(1,1-dimethylethyl)                                                          | 16.24          | 5.24       |           |
| 1-Tetracosanol                                                                                                                 | 18.07          | 0.95       |           |
| Aldehydes                                                                                                                      |                |            |           |
| Tetradecanal                                                                                                                   | 19.23          | 2.90       |           |
| n-Dodecyl aldehyde                                                                                                             | 16.94          | 1.10       |           |
| Ketone                                                                                                                         |                |            |           |
| 3,9,10-Tribromo-(+)-camphor<br>ketone                                                                                          | 21.53          | 1.90       |           |
| Ethers                                                                                                                         |                |            |           |
| Spiro[7-oxabicyclo[4.1.0]heptane-2,2'-oxirane], 1,5,5-trimethyl-6-(3-methyl-1,3-butadienyl)<br>[1.alpha.,2.alpha.,6.alpha.(E)] | 17.90          | 0.99       |           |
| Epoxyoctahydronaphthalene                                                                                                      | 20.74          | 2.58       |           |
| 1-methoxy-2-methylidenecyclopropane                                                                                            | 11.01          | 2.90       |           |

|                                                                                   |       |       |                                                                                     |
|-----------------------------------------------------------------------------------|-------|-------|-------------------------------------------------------------------------------------|
| 1,3-Dihydro-1-ethoxy-1-methoxyisobenzofuran                                       | 20.37 | 1.74  | 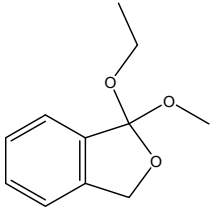 |
| Unsaturated hydrocarbons                                                          |       |       |                                                                                     |
| 4,4-Difluoro-4-iodo-2,3,3-trimethyl-1-butene                                      | 18.51 | 0.80  |  |
| HEXADECENE-1                                                                      | 16.72 | 9.39  |   |
| Saturated hydrocarbons                                                            |       |       |                                                                                     |
| Tetradecyl chloride<br>hydrocarburesaturé                                         | 19.13 | 0.83  |   |
| Others                                                                            |       |       |                                                                                     |
| 2-(2-dimethylaminoethyl)-3-cyanomethyl-5-methylindole                             | 18.68 | 3.81  |  |
| Diocadecyl phosphonate                                                            | 18.23 | 13.77 |                                                                                     |
| 1-methyl-2-carboxaldehyde-3(1-carboxaldehyde)-ethenyl-cyclopentane                | 17.73 | 1.39  |                                                                                     |
| Oct-2-yn-1-ol<br>2-Nitro-1-decen-4-yne                                            | 17.51 | 2.41  |                                                                                     |
| Octanoic acid, 7-chloro-, chloromethyl ester                                      | 17.21 | 1.48  |                                                                                     |
| Furo[3,4 -c]pyridine, 1,3-dihydro-6-methyl-7(trimethylsilyl)-Azetidine, 2-methyl- | 20.98 | 1.57  |                                                                                     |

**Table S6.** Constituents of the fraction F17 identified by Gas Chromatography Analysis (CPG).

| Noun                                                              | Retention Time | Percentage | Structure                                                                             |
|-------------------------------------------------------------------|----------------|------------|---------------------------------------------------------------------------------------|
| Alcohols                                                          |                |            |                                                                                       |
| 3,5-Di-tert-butylphenol                                           | 16.23          | 3.95       | 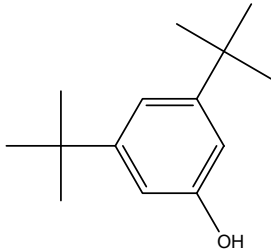   |
| 2-Heptanol, 5-ethyl                                               | 17.00          | 1.18       |    |
| 1H-Imidazole-2-methanol                                           | 14.00          | 0.67       |    |
| 2-Pentadecyn-1-ol                                                 | 20.74          | 3.05       |   |
| 2-Hydroxy Undecane                                                | 17.39          | 1.12       |   |
| Cetone                                                            |                |            |                                                                                       |
| 2-Undecanone, 6,10-dimethyl cétone                                | 18.68          | 9.68       |   |
| Esters                                                            |                |            |                                                                                       |
| Nicotinic acid, 1,6-dihydro-4-hydroxy-2-methyl-6-oxo- ethyl ester | 18.07          | 0.85       |  |
| methacrylic acid octyl ester                                      | 17.21          | 0.86       |   |

|                                                                            |       |       |                                                                                       |
|----------------------------------------------------------------------------|-------|-------|---------------------------------------------------------------------------------------|
| Hexadecanoic acid, methyl ester                                            | 19.24 | 3.64  | 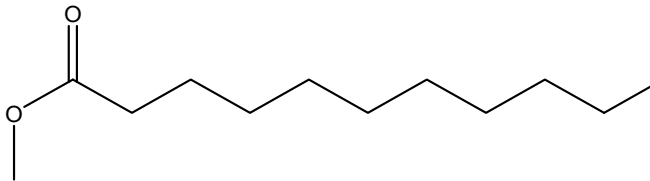    |
| Ether                                                                      |       |       |                                                                                       |
| 2-Methoxytetrahydropyran ether                                             | 15.06 | 1.27  |    |
| Unsaturated hydrocarbons                                                   |       |       |                                                                                       |
| 9-Octadecene Hydrocarbure insaturé                                         | 16.71 | 18.34 |     |
| 9-Octadecene, (E) Hydrocarbure insaturé                                    | 18.22 | 18.61 |     |
| Saturated hydrocarbons                                                     |       |       |                                                                                       |
| Chl oro-octadecane                                                         | 17.72 | 0.98  |     |
| Others                                                                     |       |       |                                                                                       |
| Acetic acid, bicyclo[2.2.1]hept-2-en-7-ylidene-Sydnone, 3-(4-nitrophenyl)- | 19.02 | 3.46  |                                                                                       |
| Acetic acid, bicyclo[2.2.1]hept-2-en-7-ylidene-17-Pentatriacontene         | 19.76 | 8.35  |                                                                                       |
| Silane, trichloroeicosyl-                                                  | 21.54 | 1.02  |   |
| Isoxazole, 5-methyl-(azole)                                                | 11.13 | 1.09  |  |
| Methyl N-(3,4-dichlorophenyl) Carbamate carbamate                          | 19.58 | 3.11  |  |
| Propane, 2-isocyanato cyanate                                              | 21.74 | 0.63  |  |
|                                                                            |       |       |                                                                                       |

**Table S7.** Constituents of the fraction F18 identified by Gas Chromatography Analysis (CPG).

| Noun                                                    | Retention Time | Percentage | structure |
|---------------------------------------------------------|----------------|------------|-----------|
| Alcohols                                                |                |            |           |
| Hexahydropyridine, 4-[4,5-dihydroxyphenyl]              | 23.32          | 0.21       |           |
| 3-Hydroxy -1-hexyne                                     | 15.07          | 0.35       |           |
| 1-Hexadecanol                                           | 20.73          | 2.75       |           |
| 3,7, 11,15-Tetramethylhexadecanol                       | 20.44          | 1.79       |           |
| 1-Dodecanol, 2-methyl-, (S)-                            | 21.54          | 1.10       |           |
| Aldehyde                                                |                |            |           |
| 4-hydroxytetradec-2-ynal                                | 23.87          | 0.29       |           |
| Amide                                                   |                |            |           |
| Propionamide (amides)                                   | 34,05          |            |           |
| Cetones                                                 |                |            |           |
| 5-Chloro-2-methyl-4-isothi azolin-3-one (cetone)        | 26.71          | 0.20       |           |
| 1-(3,4)-Methylenedioxyphenyl-2-propanone oxime (cetone) | 28.64          | 0.32       |           |
| Methyl n-hexyl ketone (Cétone)                          | 18.67          | 8.95       |           |
| Amine                                                   |                |            |           |

|                                                          |              |              |                                                                                       |
|----------------------------------------------------------|--------------|--------------|---------------------------------------------------------------------------------------|
| <b>1,2-DIMETHYLAZETIDINE</b><br>(Cycloamine)             | <b>11.15</b> | <b>0.35</b>  | 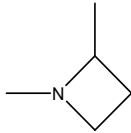   |
| Esters                                                   |              |              |                                                                                       |
| <b>Heptanedioic acid, dimethyl ester</b><br>(ester)      | <b>20.92</b> | <b>0.80</b>  |     |
| <b>Hexadecanoic acid, methyl ester</b><br>(ester)        | <b>19.24</b> | <b>4.86</b>  |     |
| <b>Ethyl 2,2-Difluoro-4-iodooctanoate</b><br>(esters)    | <b>35,24</b> | <b>0.35</b>  |     |
| Saturated hydrocarbons                                   |              |              |                                                                                       |
| <b>Eicosyltrichlorosilane</b><br>(Hydrocarburesaturé)    | <b>19.77</b> | <b>10.24</b> |     |
| Others                                                   |              |              |                                                                                       |
| <b>(Z)-cis-6,7-Epoxyheptadec-9-ene</b><br>(epoxy)        | <b>22.77</b> | <b>0.33</b>  |    |
| <b>CYANO METHYL-TRIIRON DISULFIDE OCTACARBONYL</b>       | <b>19.14</b> | <b>1.46</b>  |                                                                                       |
| <b>2H-Benzotriazole, 2-ethyl</b>                         | <b>35,54</b> | <b>0.18</b>  |  |
| <b>1,6-dimethyl-pyrimido[5,4-e][1,2,4]triazine-5-one</b> | <b>28.43</b> | <b>0.23</b>  |                                                                                       |
| <b>Bicycle(2.2.1)hept-2'-en-7'-ylideneacetic acid</b>    | <b>20.06</b> | <b>0.98</b>  |                                                                                       |

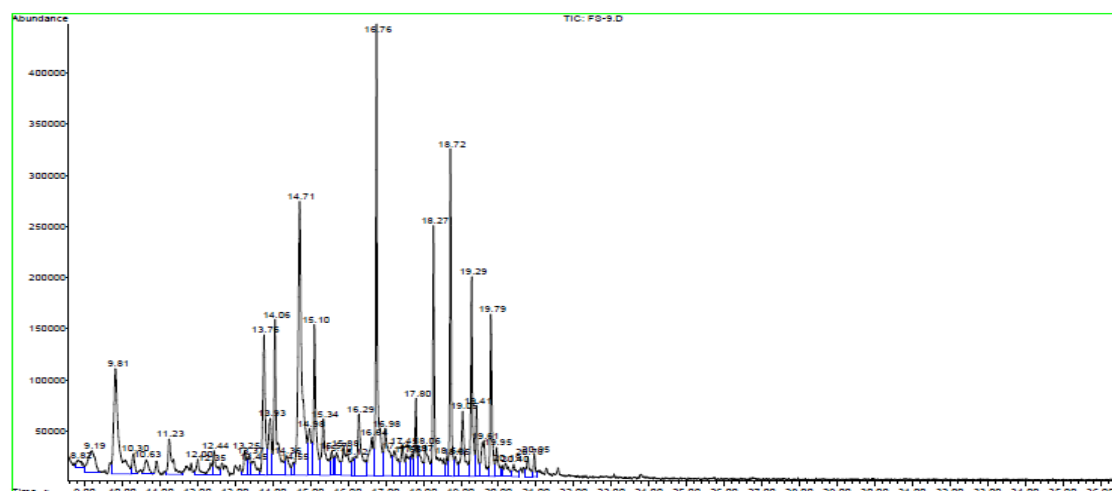

**Figure S1.** Chromatogram CPG of F9 dichloromethane extract fraction of *Raphanus raphanistrum* recorded on an apolar HP-5 column.

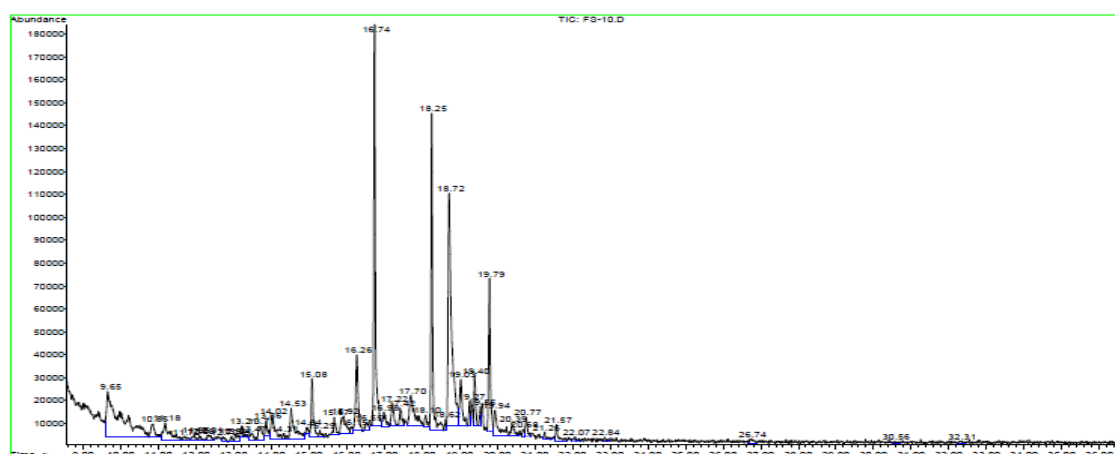

**Figure S2.** Chromatogram CPG of F10 dichloromethane extract fraction of *Raphanus raphanistrum* recorded on an apolar HP-5 column.

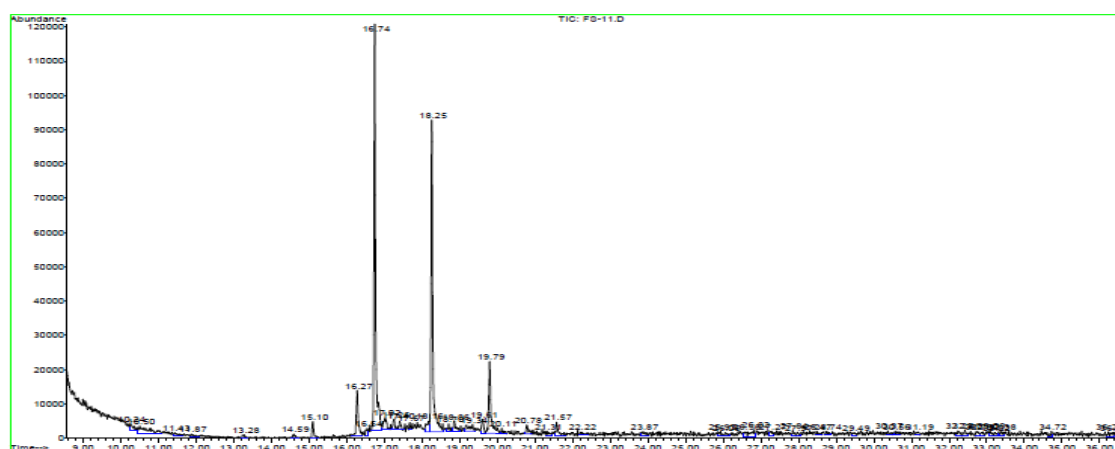

**Figure S3.** Chromatogram CPG of F11 dichloromethane extract fraction of *Raphanus raphanistrum* recorded on an apolar HP-5 column.



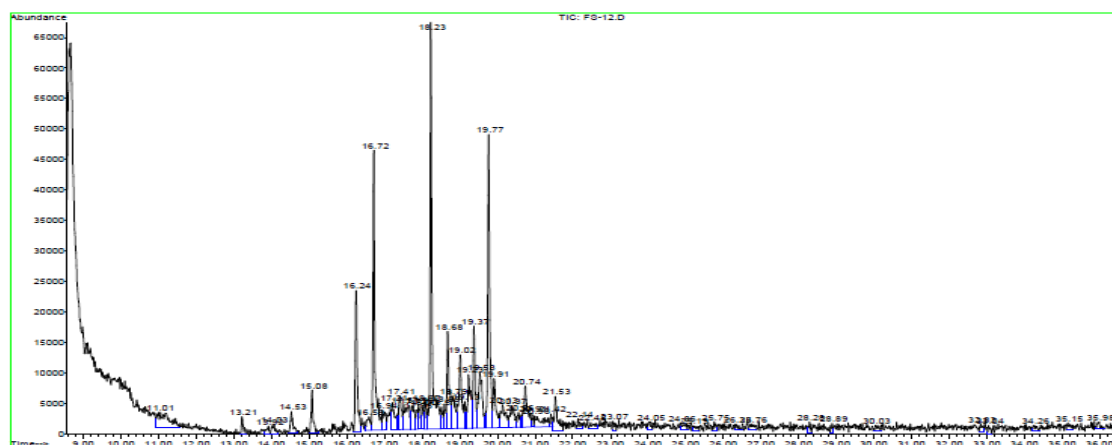

**Figure S4.** Chromatogram CPG of F12 dichloromethane extract fraction of *Raphanus raphanistrum* recorded on an apolar HP-5 column.

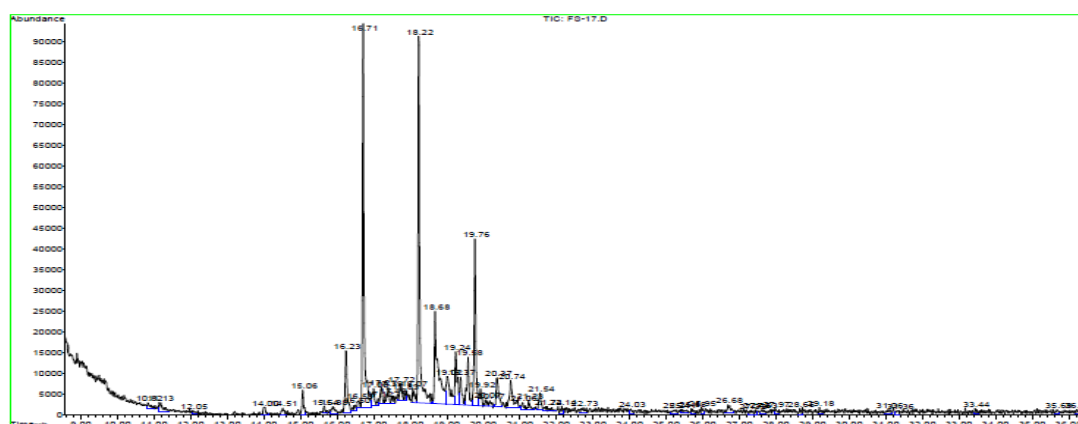

**Figure S5.** Chromatogram CPG of F17 dichloromethane extract fraction of *Raphanus raphanistrum* recorded on an apolar HP-5 column.

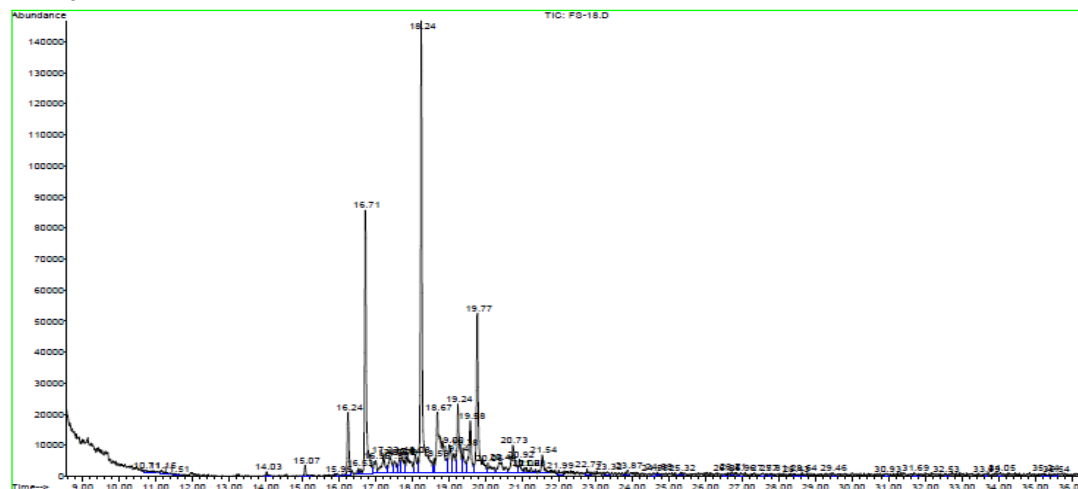

**Figure S6.** Chromatogram CPG of F18 dichloromethane extract fraction of *Raphanus raphanistrum* recorded on an apolar HP-5 column.
